# Supplementary material
Source: Springer Nature journal article supplement (https://www.springermedizin.de/resource/supplementary/12955_2009_653_MOESM4_ESM.pdf/9561008)
Supplement: MOESM4 [file 9561008]

Search terms used in computerized databases either singly or in combination

*Cervical/cervix cancer, survivors, quality of life, measur\*, assessment, instruments*

**Cross-database search = 296 articles**

CINAHL = 37, Scopus = 66, PsycInfo = 155, Medline = 29, CJFD = 11.

Removal of overlapping articles and articles excluded due to selection criteria  
= **53** articles

Excluded due to use of self-designed instruments and failure to report reliability  
and validity = **12** articles

Final articles in this review = **41** articles
